# Supplementary material
Source: PubMed Central journal article supplement (PMC5815892)
Supplement: NIHMS920800-supplement-3.pdf [file NIHMS920800-supplement-3.pdf]

*Development of a function-blocking antibody against fibulin-3 as targeted reagent for glioblastoma*

Mohan S. Nandhu et al.

**Supplemental Table I:**

Antibodies used for Western blotting and immunohistochemistry (IHC)

| <b>Target</b>                                 | <b>Source</b>             | <b>Catalog number</b> | <b>Host species</b> | <b>Target species</b> | <b>Application</b> |
|-----------------------------------------------|---------------------------|-----------------------|---------------------|-----------------------|--------------------|
| Fibulin-3                                     | Santa Cruz Biotechnology  | SC-33722 (mAb3-5)     | Mouse               | Human, mouse          | Western / IHC      |
| RelA/p65                                      | Cell Signaling Technology | 8242                  | Rabbit              | Human, mouse, rat     | Western            |
| Phospho-RelA/p-p65                            | Cell Signaling Technology | 3037                  | Rabbit              | Human, mouse, rat     | Western            |
| neoepitope Val <sup>1744</sup> -Notch1 (NICD) | Cell Signaling Technology | 4147                  | Rabbit              | Human, mouse, rat     | Western            |
| Hes5                                          | Santa Cruz Biotechnology  | SC-13860              | Goat                | Human, mouse          | Western            |
| CD31                                          | Abcam                     | 28364                 | Rabbit              | Mouse >> human        | IHC                |
| IBA1                                          | Wako Chemicals            | 019-19741             | Mouse               | Human, mouse, rat     | IHC                |
| Phospho-H2A.X                                 | Cell Signaling Technology | 9718                  | Rabbit              | Human, mouse, rat     | IHC                |
| Caspase-3                                     | Cell Signaling Technology | 9661                  | Rabbit              | Human, mouse, rat     | Western            |
| alpha/beta-tubulin                            | Cell Signaling Technology | 2148                  | Rabbit              | Human, mouse, rat     | Western            |
| V5 epitope                                    | Invitrogen                | MA5-15253             | Mouse               | V5 tag                | Western            |
| 5-Br-deoxyuridine                             | Accurate Chemicals        | OBT0030               | Rat                 | BrdU tag              | IHC                |

**Supplemental Table II:**

Sequences used for qRT-PCR primers

| Target               | Sequence                    | Species specificity |
|----------------------|-----------------------------|---------------------|
| Hes1 forward         | 5'- CTTCAGCGAGTGCATGAACG    | human / rat / mouse |
| Hes1 reverse         | 5'- GATCTGGGTCATGCAGTTGG    | human / rat / mouse |
| Hes5 forward         | 5'- AGCCGGTGGTGGAGAAGATG    | human / rat / mouse |
| Hes5 reverse         | 5'- TCCAGGATGTCGGCCTTCTC    | human / rat / mouse |
| MMP2 forward         | 5'- CCATCGAGACCATGCGGAAG    | human / rat / mouse |
| MMP2 reverse         | 5'- CCTGTATGTGATCTGGTTCTTG  | human / rat / mouse |
| MMP9 forward         | 5'- TCATCCAGTTTGGTGTGCGG    | human / rat / mouse |
| MMP9 reverse         | 5'- GACCACAACCTCGTCGTCGTC   | human / rat / mouse |
| fibulin-3 forward    | 5'- TCAGACATCTTCCAGATACAG   | human / rat / mouse |
| fibulin-3 reverse    | 5'- CCCACTATTATTGTCAATCTTAA | human / rat / mouse |
| IL1 $\beta$ forward  | 5'- GCTTCAGGCAGGCAGTATC     | Mouse specific      |
| IL1 $\beta$ reverse  | 5'- AGGATGGGCTCTTCTTCAAAG   | Mouse specific      |
| IL6 forward          | 5'- TTCCATCCAGTTGCCTTCTTG   | Mouse specific      |
| IL6 reverse          | 5'- CATTTCACGATTTCCAGAG     | Mouse specific      |
| IL10 forward         | 5'- CAAGGAGCATTTGAATTCCC    | Mouse specific      |
| IL10 reverse         | 5'- GGCCTTGTAGACACCTTGGTC   | Mouse specific      |
| IFN $\gamma$ forward | 5'- AACTGGCAAAGGATGGTGA     | Mouse specific      |
| IFN $\gamma$ reverse | 5'- TTCAATGACGCTTATGTTGT    | Mouse specific      |
| IL1 $\beta$ forward  | 5'- CCTCTCTCACCTCTCCTACTCA  | Human specific      |
| IL1 $\beta$ reverse  | 5'- CTGCTACTTCTTGCCCCCTTT   | Human specific      |
| IL6 forward          | 5'- ACAGCCACTCACCTCTTCAG    | Human specific      |
| IL6 reverse          | 5'- AGCATCCATCTTTTTTCAGCCAT | Human specific      |
| IL10 forward         | 5'- GCCACCCTGATGTCTCAGTT    | Human specific      |
| IL10 reverse         | 5'- GTGGAGCAGGTGAAGAATGC    | Human specific      |
| IFN $\gamma$ forward | 5'- ACAGGGAAGCGAAAAAGGAGT   | Human specific      |
| IFN $\gamma$ reverse | 5'- GCAGGCAGGACAACCATTAC    | Human specific      |
| GAPDH forward        | 5'- AGTCCATGCCATCACTGCCAC   | human / rat / mouse |
| GAPDH reverse        | 5'- ATGACCTTGCCCACAGCCTTG   | human / rat / mouse |
| rRNA 18S forward     | 5'- AACTTTTCGATGGTAGTCGCCG  | human / rat / mouse |
| rRNA 18S reverse     | 5'- CCTTGGATGTGGTAGCCGTTT   | human / rat / mouse |
