# Supplementary material
Source: PubMed Central journal article supplement (PMC5815892)

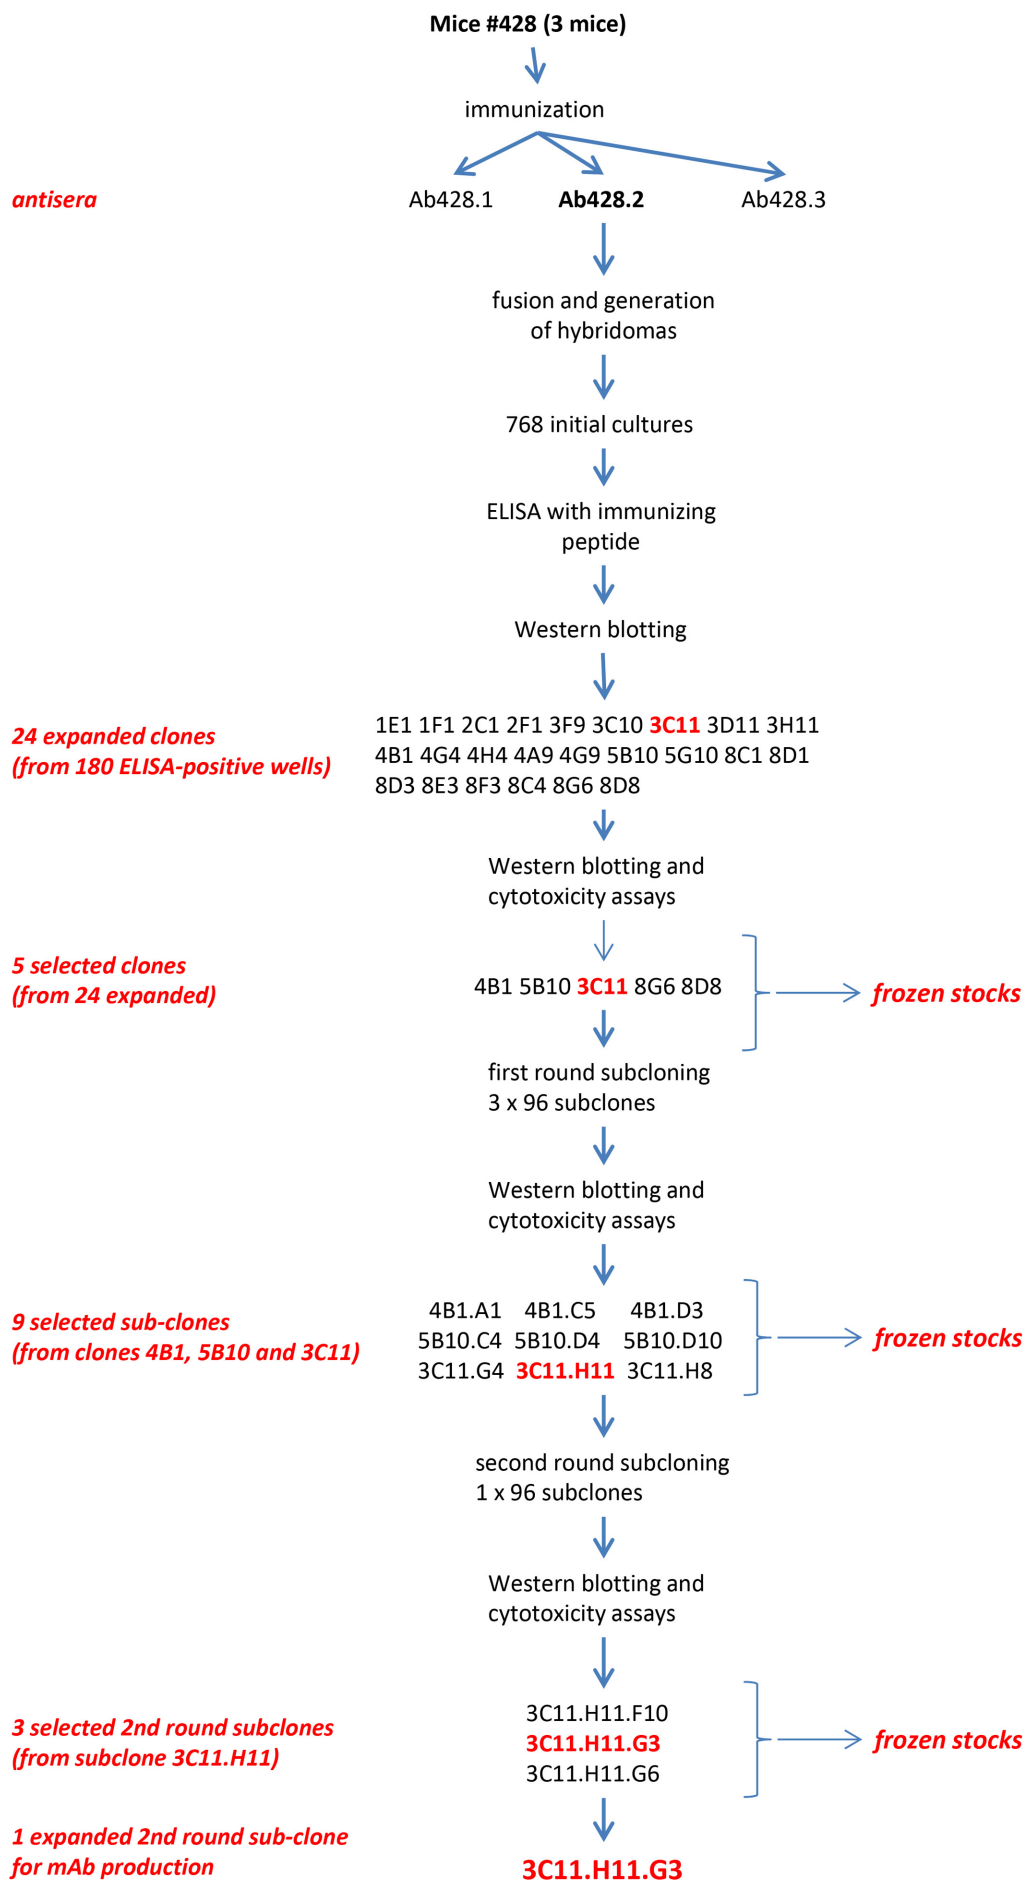

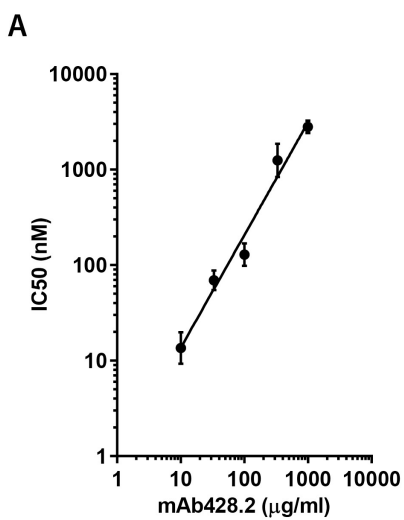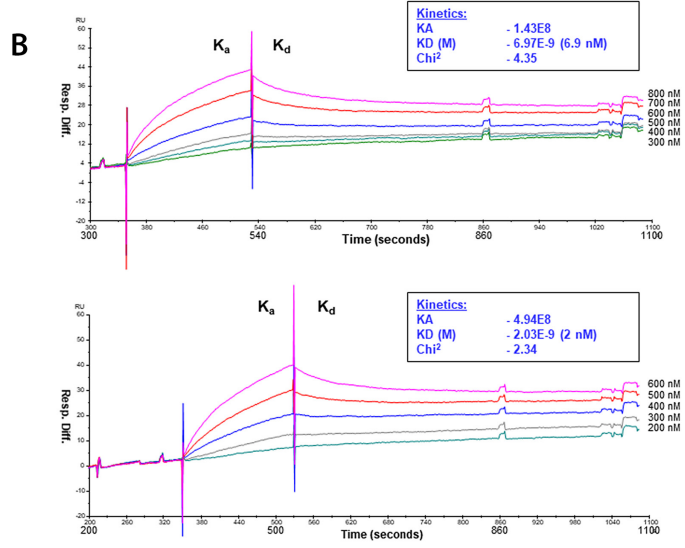

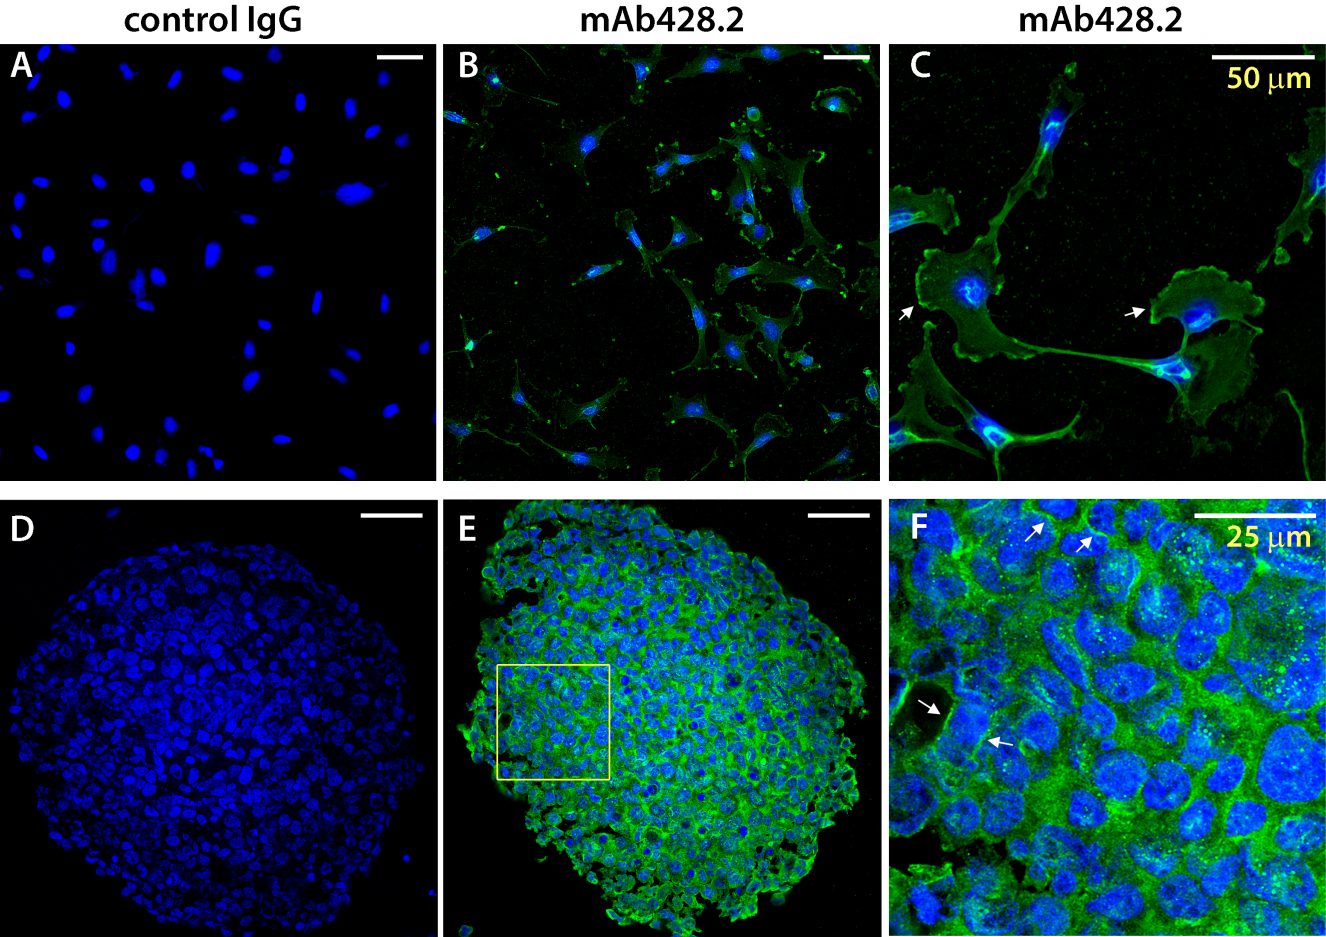

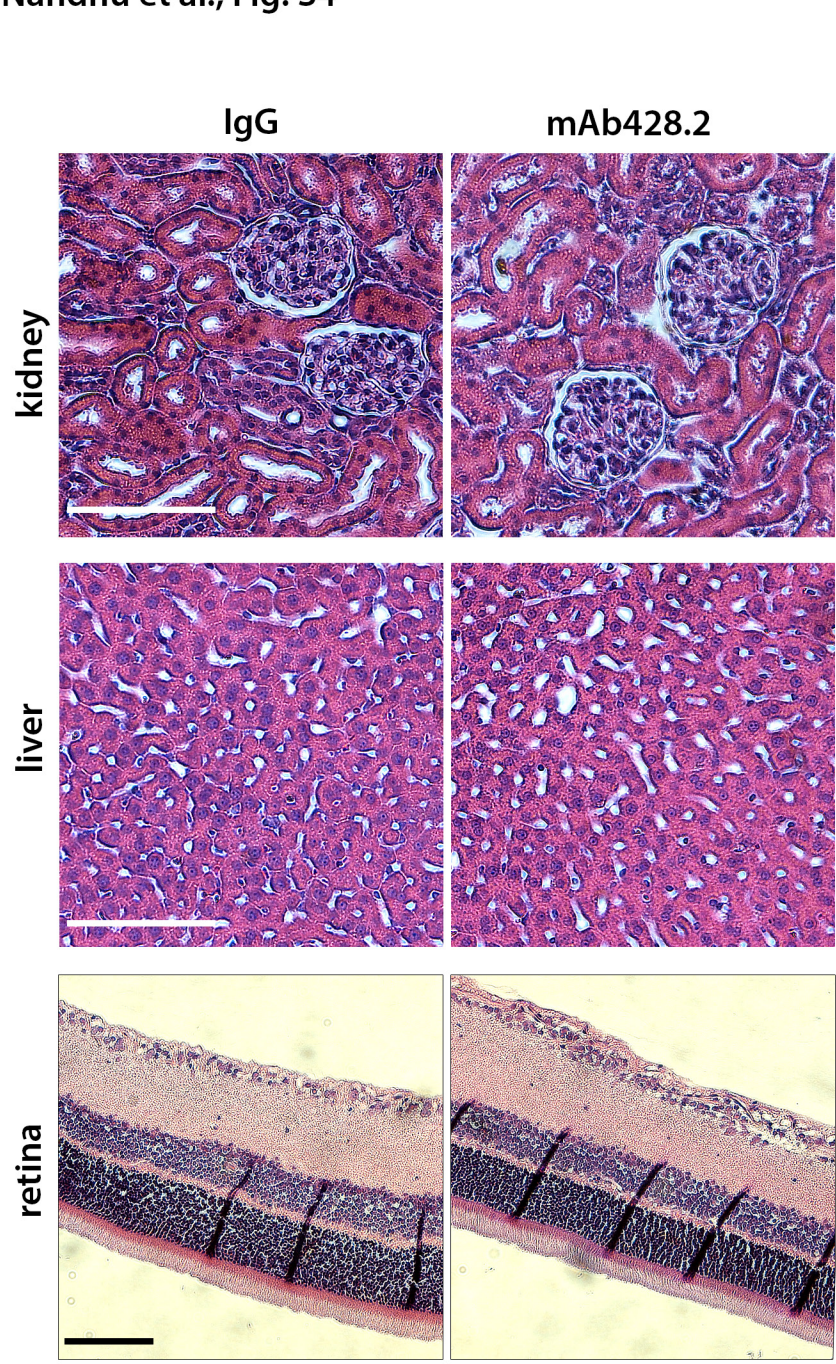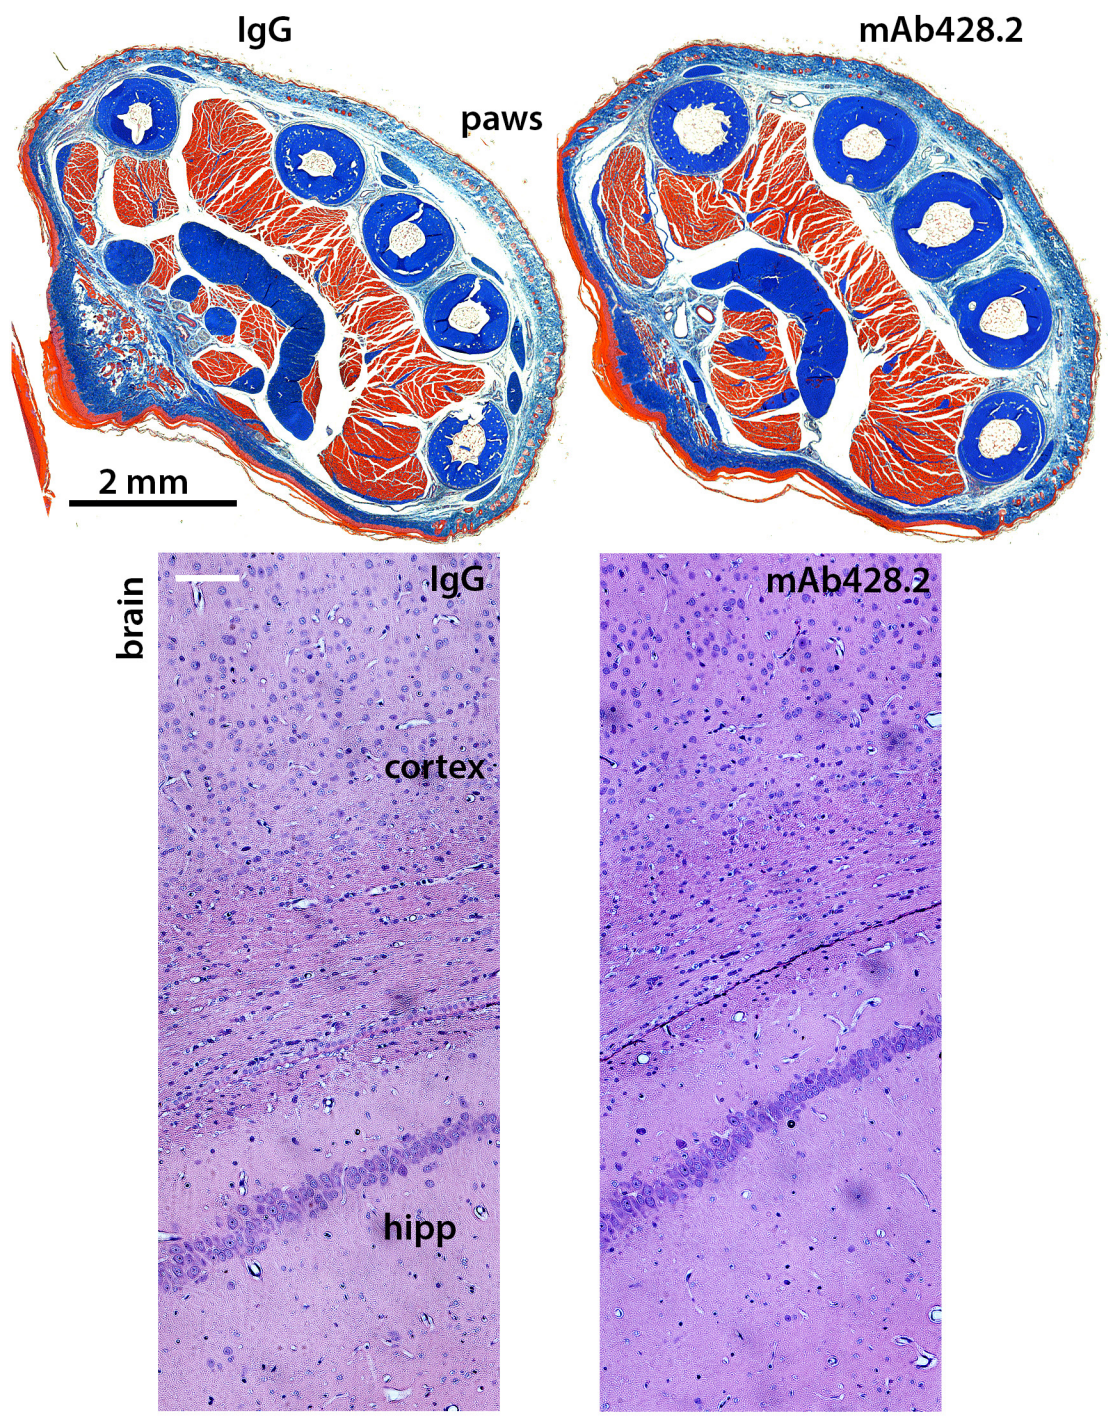

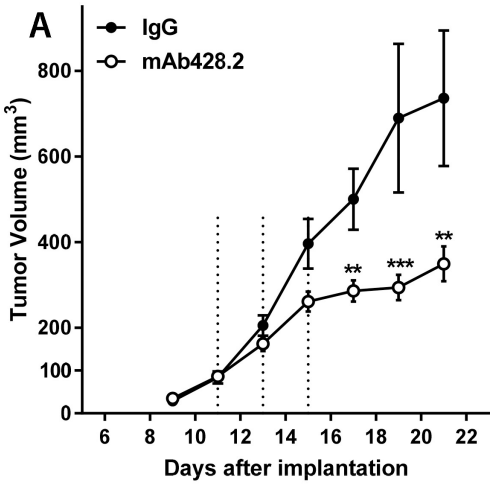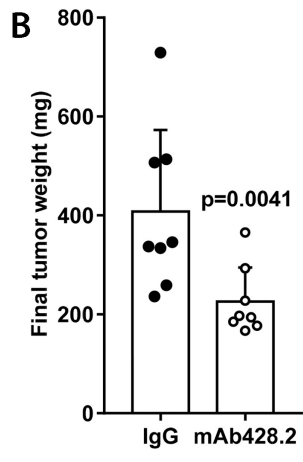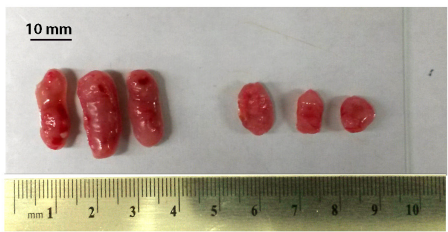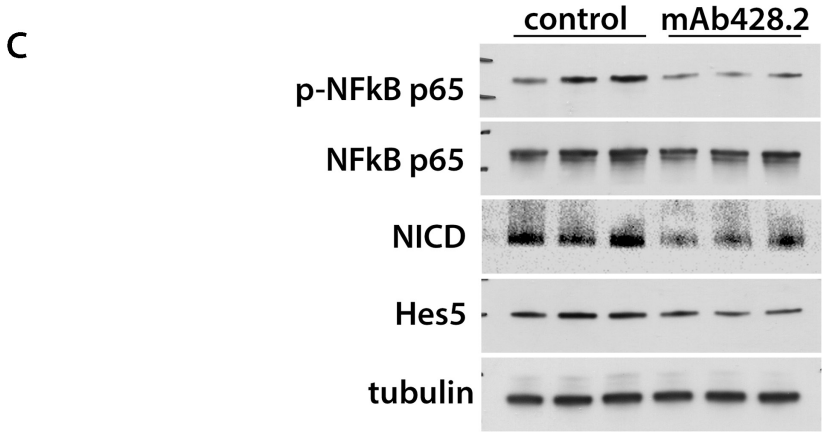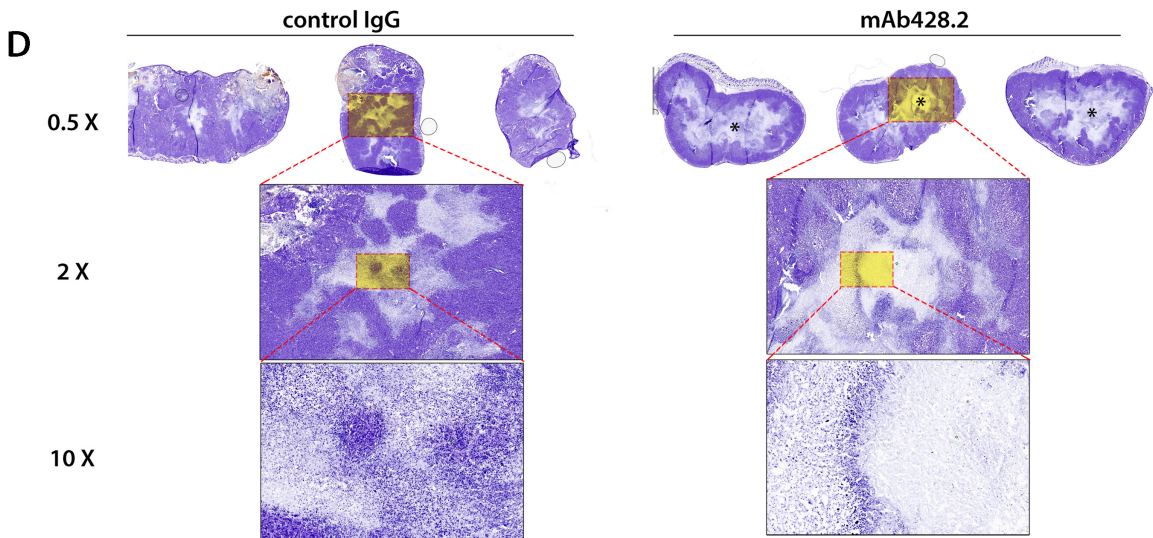

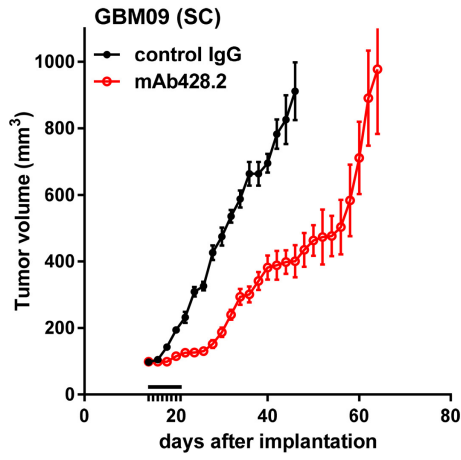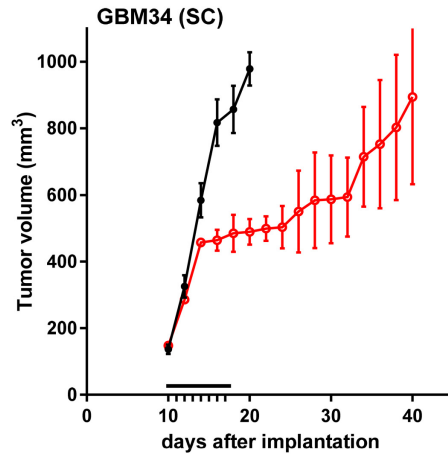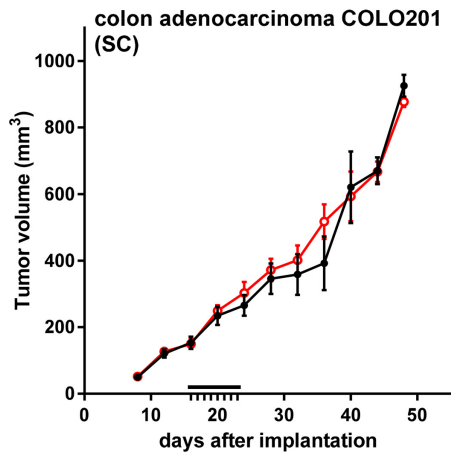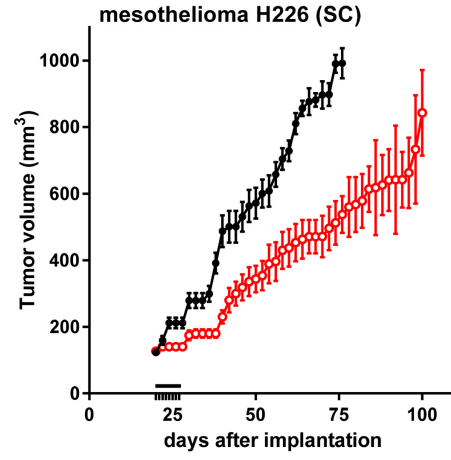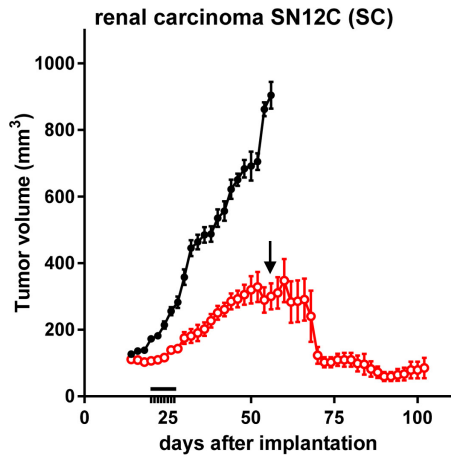

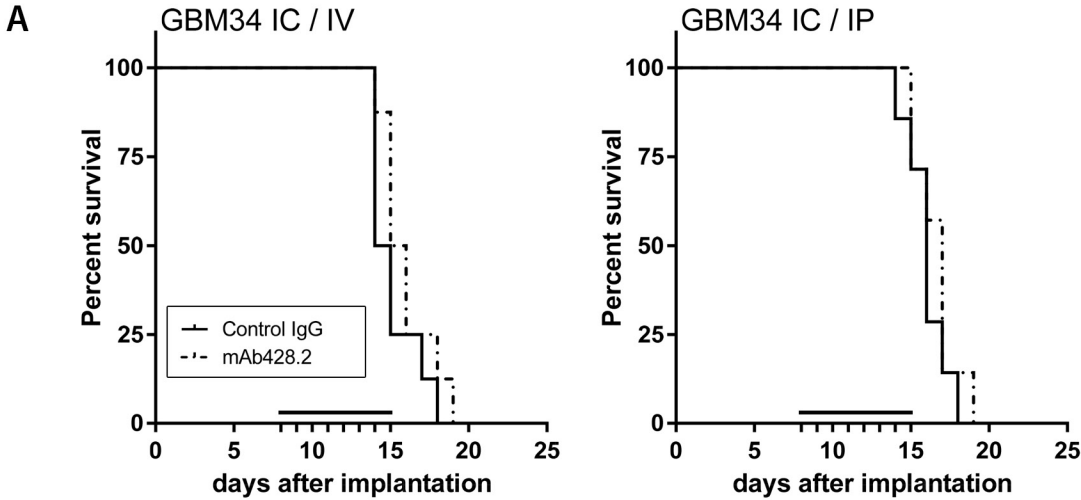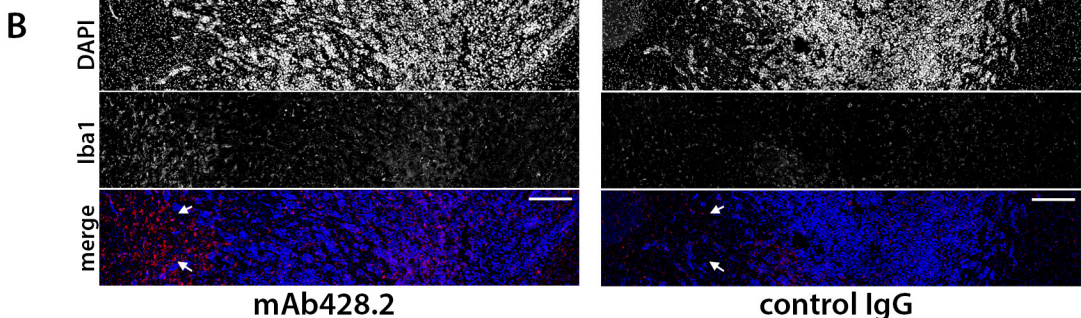

**A**

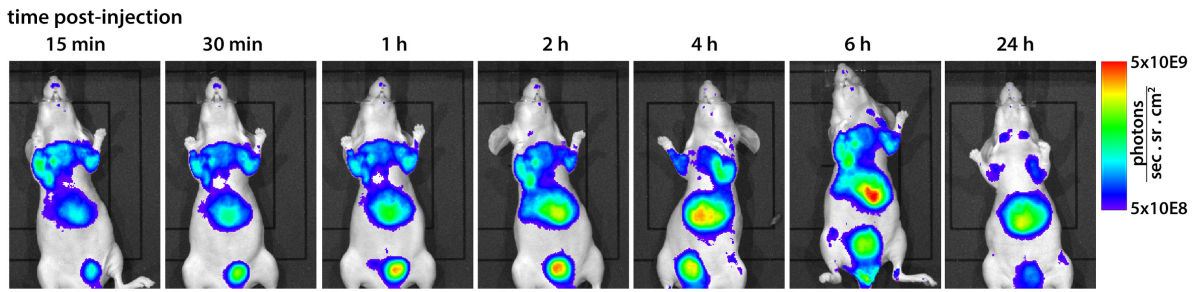

**B**

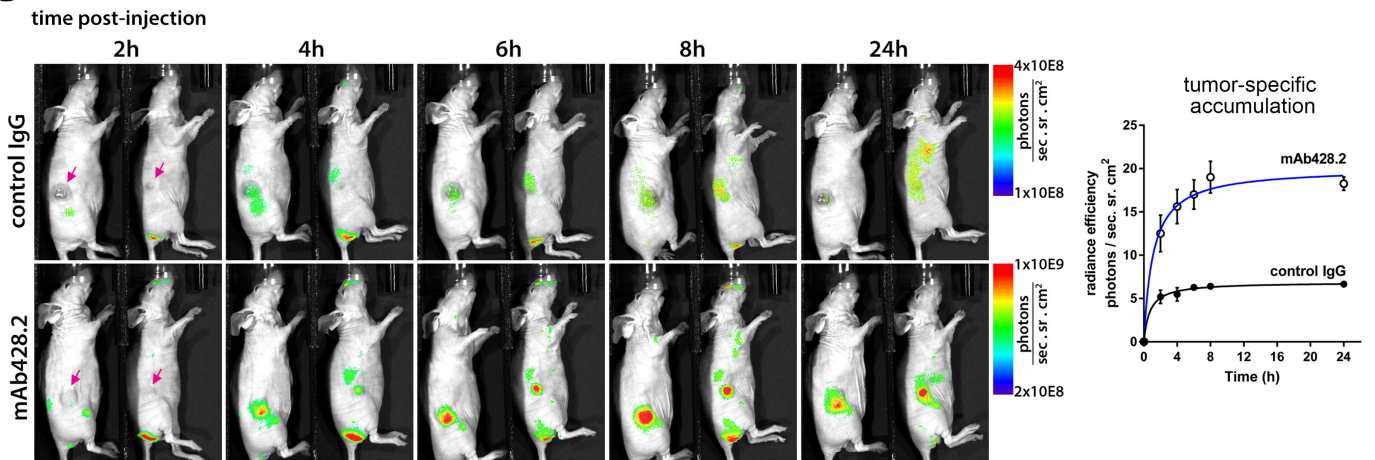

**C**

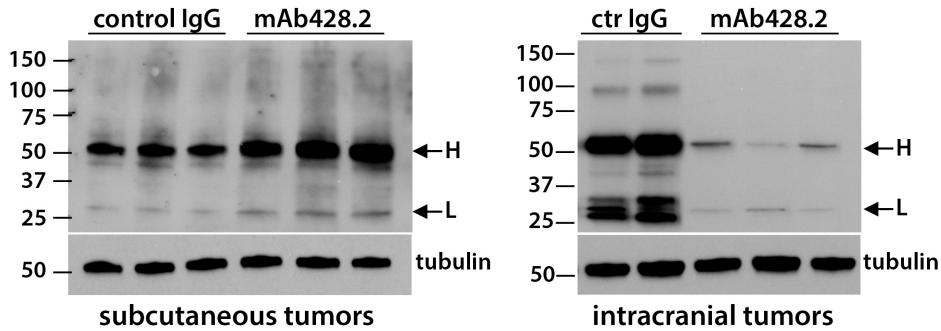

**D**

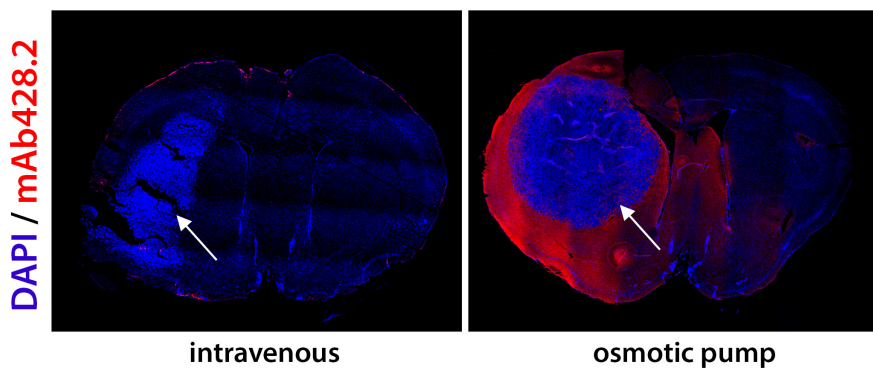

Supplement: NIHMS920800-supplement-2.pdf [file NIHMS920800-supplement-2.pdf]
